# Supplementary material for: Shading Treatment Reduces Grape Sugar Content by Suppressing Photosynthesis-Antenna Protein Pathway Gene Expression in Grape Berries
Source: MDPI journal article supplement (doi:10.3390/ijms25095029), 2024-05-05
Supplement: s1 [file s1]

Table S1 Eight differential genes were used for primer sequence of qRT-PCR.

| Gene name                 |                     | Primer sequence           |
|---------------------------|---------------------|---------------------------|
| VIT-12s0055g01110 (Lhcb6) | VIT_12s0055g01110-F | TGGGCTCTCCGTTCTTGACTG     |
|                           | VIT_12s0055g01110-R | GGCAGCAGCGACGACAATG       |
| VIT_08s0007g02190 (Lhcb4) | VIT_08s0007g02190-F | CCGCCACTCCTTACACAACAG     |
|                           | VIT_08s0007g02190-R | TTTCTTACGACCGAACCCGAATC   |
| VIT_19s0014g03660 (Lhcb3) | VIT_19s0014g03660-F | CCGCTGGATTGTCTGCTGATC     |
|                           | VIT_19s0014g03660-R | CTAAGCCACTTCTCAAGGACTTCTG |
| VIT_12s0057g00630 (Lhcb2) | VIT_12s0057g00630-F | GCAGAACTGAAGGTGAAGGAGATC  |
|                           | VIT_12s0057g00630-R | TGACAATAGCCTGAACGAAGAATCC |
| VIT_10s0003g02900 (Lhcb1) | VIT_10s0003g02900-F | GCAGAGCCTTACTTACTTGGATGG  |
|                           | VIT_10s0003g02900-R | ACCGCCCGTTGATGACCTC       |
| VIT_15s0024g00040 (Lhca3) | VIT_15s0024g00040-F | CCACCATCTCTCCCAGTTCTCAG   |
|                           | VIT_15s0024g00040-R | ACTTCTTCAGGCTCAGTCTCTTCC  |
| VIT_01s0010g03620 (Lhca2) | VIT_01s0010g03620-F | CCACCATCTCTCCCAGTTCTCAG   |
|                           | VIT_01s0010g03620-R | ACTTCTTCAGGCTCAGTCTCTTCC  |
| VIT_13s0019g04140 (Lhca1) | VIT_13s0019g04140-F | ATGGAGAAGGACACCGAGAAGAAG  |
|                           | VIT_13s0019g04140-R | ACGCAGAACCCGACGAACG       |
| Primer parameters         | VvGAPDH-F           | TTCTCGTTGAGGGCTATTCCA     |
|                           | VvGAPDH-R:          | CCACAGACTTCATCGGTGACA     |
